# Supplementary material
Source: PubMed Central journal article supplement (PMC7288700)
Supplement: ao0c01320_si_001.pdf [file ao0c01320_si_001.pdf]

## *Supporting Information for*

# **A Near-Infrared Dual-Emission Ratiometric Fluorescence Imaging Nanoprobe for Real-Time Tracing the Generation of Endogenous Peroxynitrite in Single Living Cell and in Vivo**

Pengxiang Lin, Dongxia Chen, Liangliang Zhang,\* Jiayao Xu, Yong Huang, and Shulin Zhao\*

State Key Laboratory for the Chemistry and Molecular Engineering of Medicinal Resources, Guangxi Normal University, Guilin, 541004, China.

### **Table of contents**

|           |         |
|-----------|---------|
| Figure S1 | -----S2 |
| Figure S2 | -----S3 |
| Figure S3 | -----S3 |
| Figure S4 | -----S4 |
| Figure S5 | -----S4 |
| Figure S6 | -----S5 |
| Figure S7 | -----S5 |
| Figure S8 | -----S6 |
| Figure S9 | -----S7 |

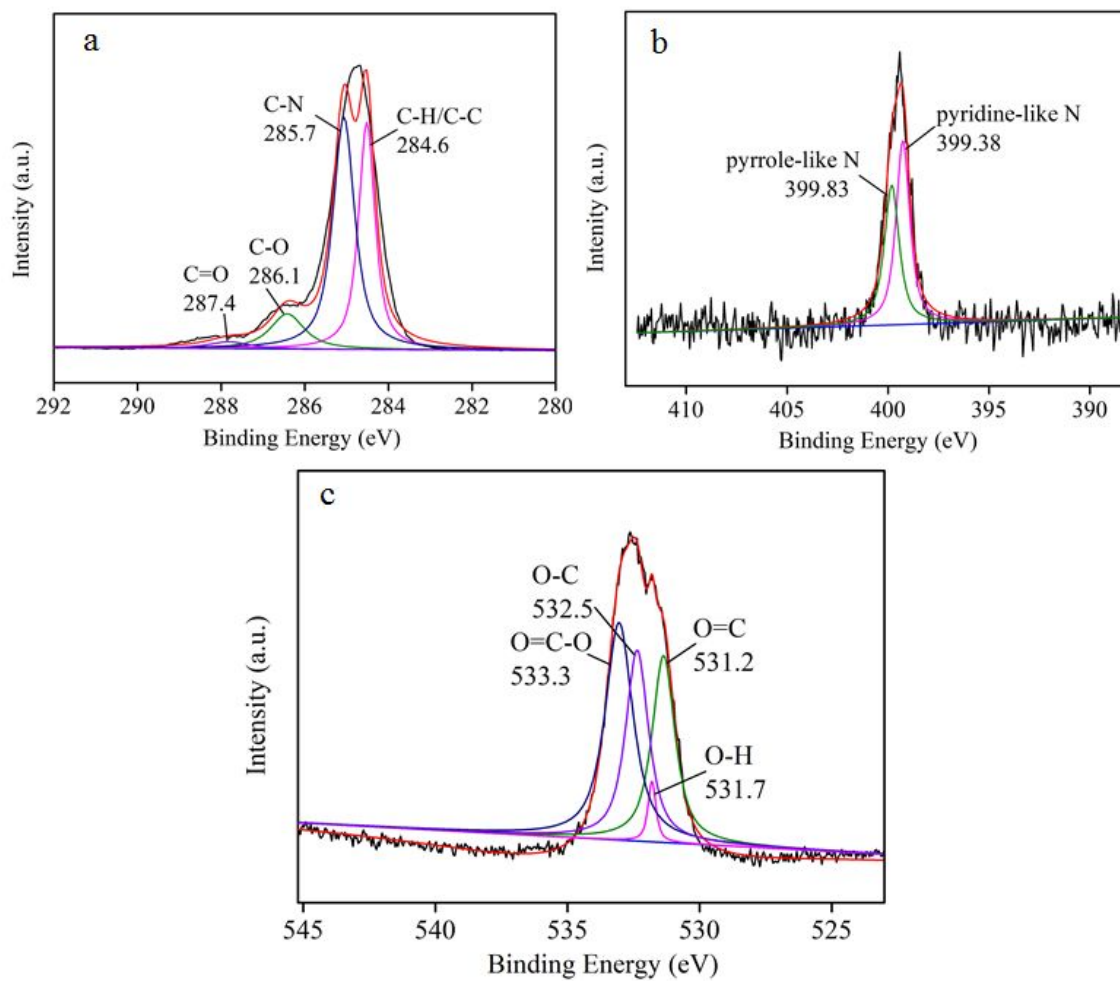

**Figure S1.** High-resolution XPS spectra of NI-BQDs for C1s (a), N1s (b) and O1s (c).

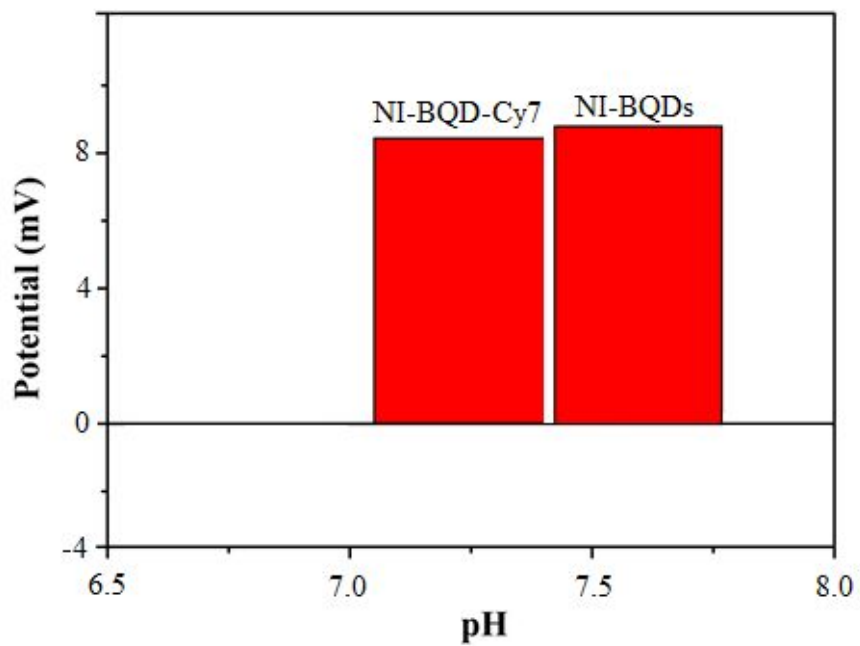

**Figure S2.** Zeta-potential of the as-prepared NI-BQDs and NI-BQD-Cy7.

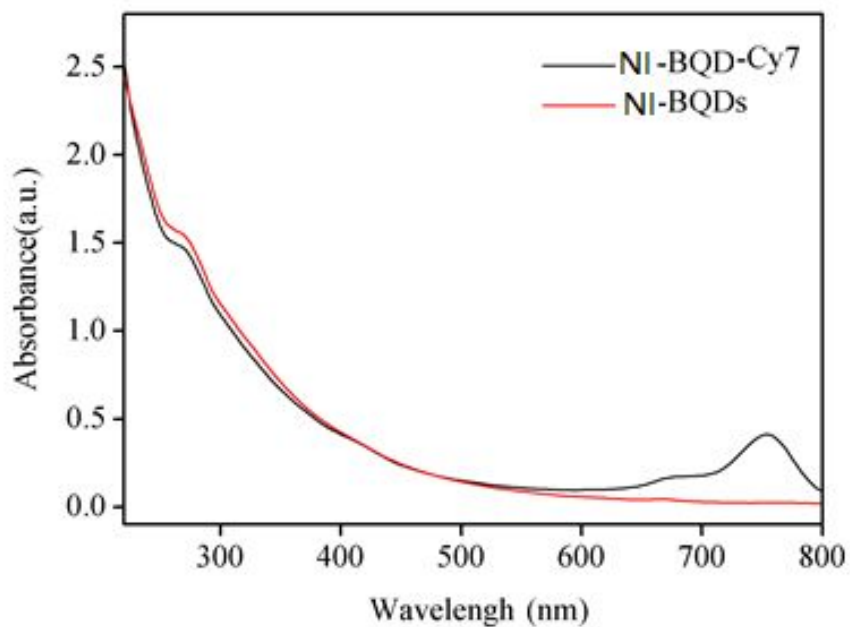

**Figure S3.** The UV-Vis spectra of NI-BQDs and NI-BQD-Cy7.

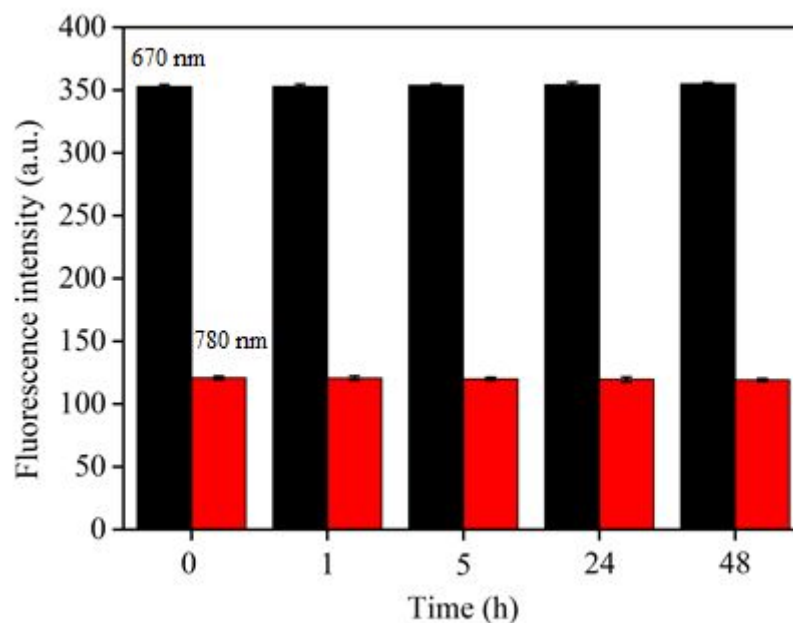

**Figure S4.** Stability of NI-BQD-Cy7 fluorescent nanoprobe in aqueous solution.

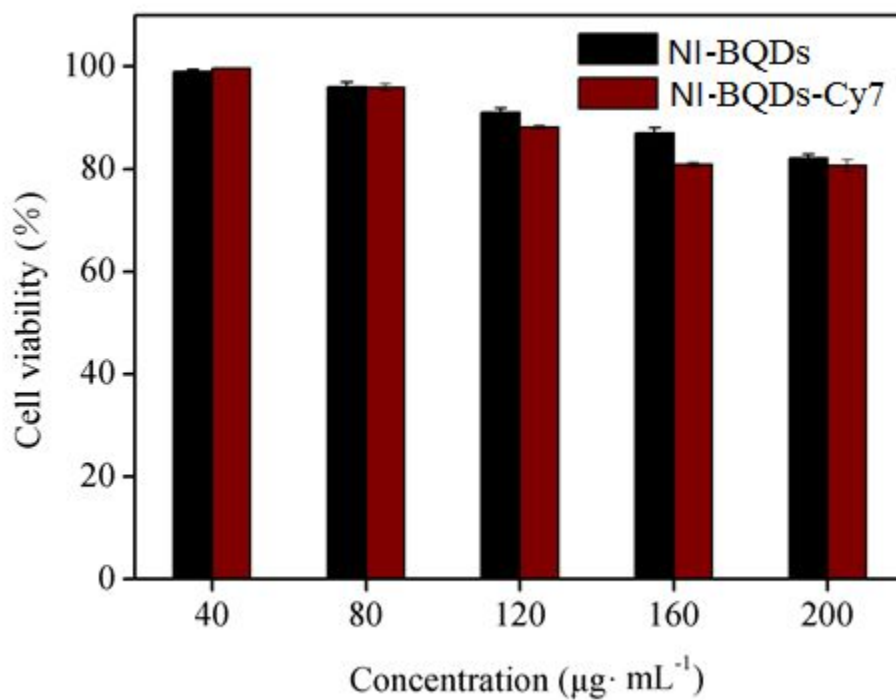

**Figure S5.** Cytotoxicity of the NI-BQDs and NI-BQD-Cy7 nanoprobe.

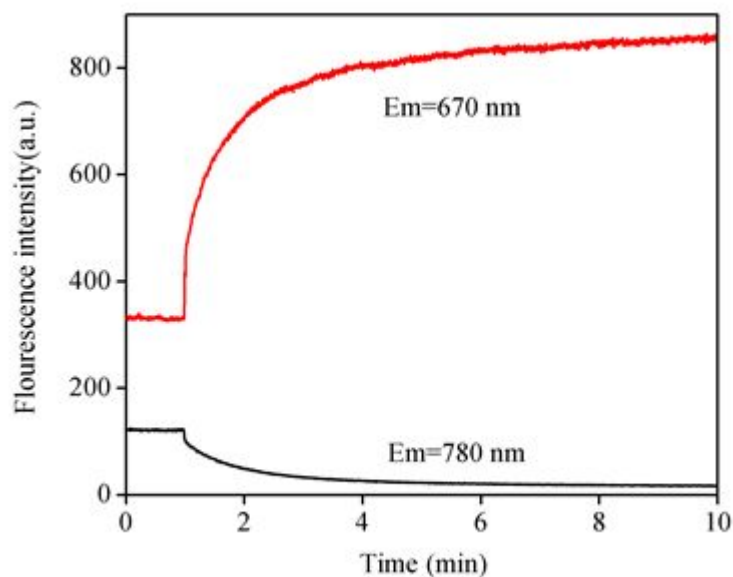

**Figure S6.** Kinetics curve for the change of fluorescence intensity of NI-BQD-Cy7 after the addition of ONOO<sup>-</sup>.

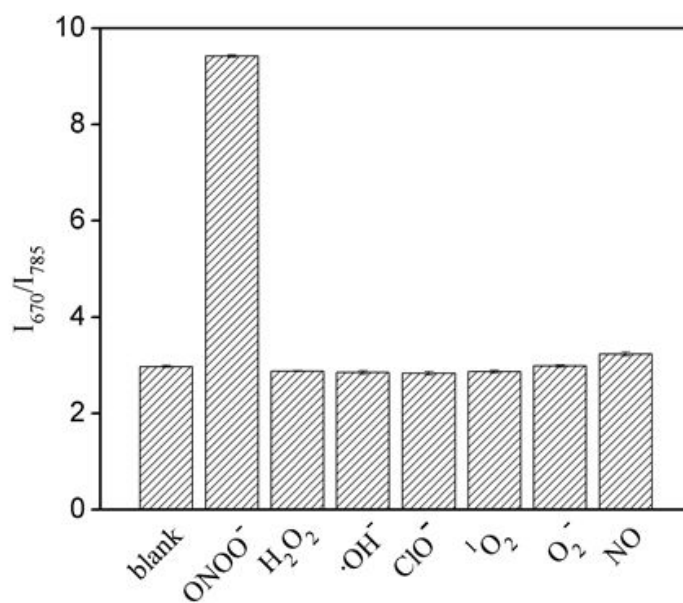

**Figure S7.** Selectivity of the NI-BQD-Cy7 nanoprobes in the presence of other bioactive RNS and ROS molecules.

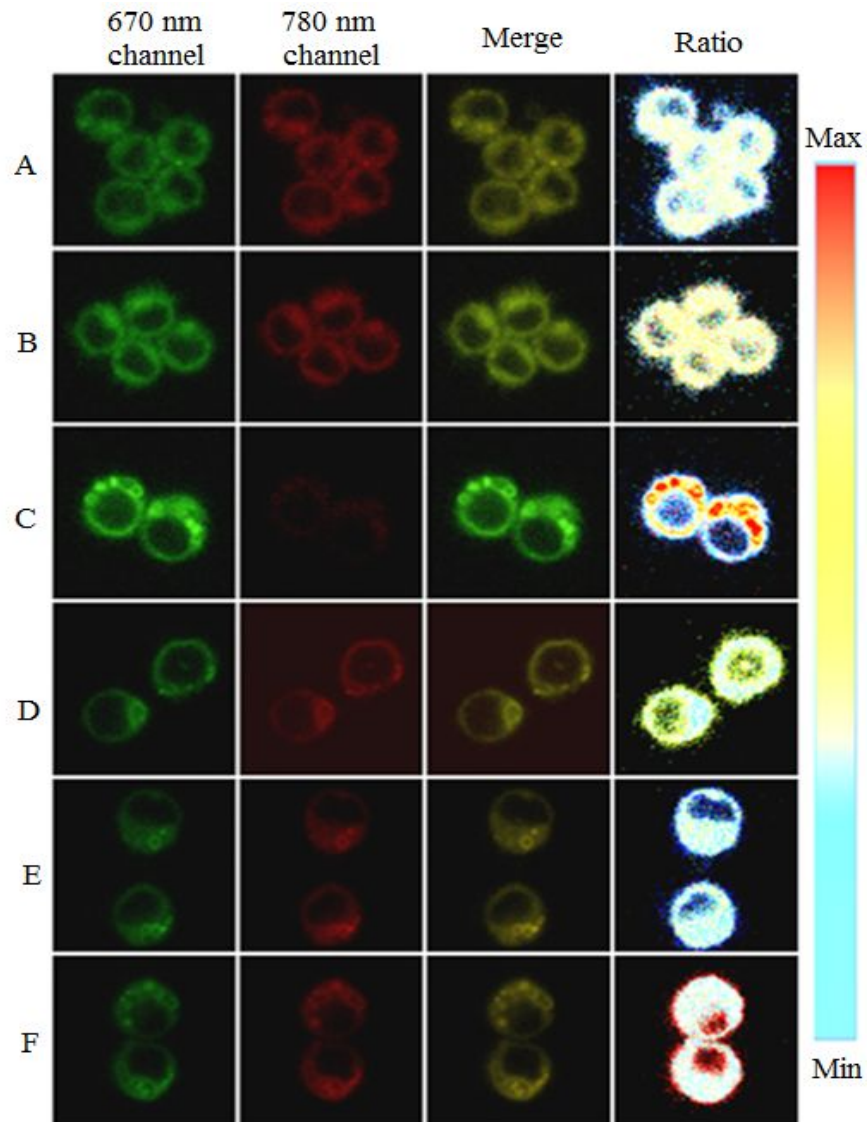

**Figure S8.** Dual channel ratiometric fluorescence images of exogenous  $\text{ONOO}^-$  in living cells. The RAW264.7 cells solution containing NI-BQD-Cy7 nanoprobe was incubated with PBS solution (A),  $100 \mu\text{M}$  SIN-1 solution (B),  $1 \text{ mM}$  SIN-1 solution (C), a mixed solution containing  $1 \text{ mM}$  SIN-1 and  $100 \mu\text{M}$  tetracycline (D),  $100 \mu\text{M}$  MSB (E) and  $500 \mu\text{M}$  NOC-18 solution (F).

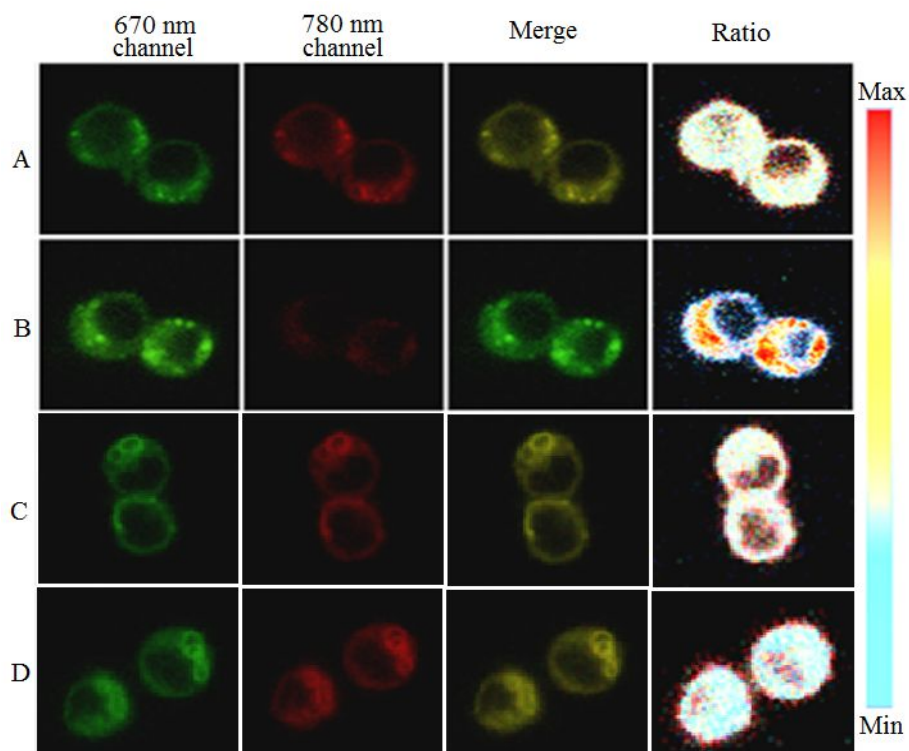

**Figure S9.** Dual channel ratiometric fluorescence images of endogenous  $\text{ONOO}^-$  in living cells. The RAW264.7 cells solution containing NI-BQD-Cy7 nanoprobe was incubated with PBS solution (A), a mixed solution containing 50 ng/mL  $\text{INF-}\gamma$ , 1  $\mu\text{g/mL}$  LPS and 25 nM PMA (B), a mixed solution containing 50 ng/mL  $\text{INF-}\gamma$ , 1  $\mu\text{g/mL}$  LPS, 25 nM PMA and 100  $\mu\text{M}$  1400W (C), a mixed solution containing 50 ng/mL  $\text{INF-}\gamma$ , 1  $\mu\text{g/mL}$  LPS, 25 nM PMA and 100  $\mu\text{M}$  apocynin (D).
